# Supplementary material for: Whole-genome sequencing analysis identifies rare, large-effect noncoding variants and regulatory regions associated with circulating protein levels
Source: Springer Nature journal article supplement (doi:10.1038/s41588-025-02095-4), 2025-02-24
Supplement: MOESM1 [file 41588_2025_2095_MOESM1_ESM.pdf]

# **Whole-genome sequencing analysis identifies rare, large-effect noncoding variants and regulatory regions associated with circulating protein levels**

---

In the format provided by the  
authors and unedited

## Supplementary Information

### Analysis of Coding Variants

The average effect of predicted loss-of-function variants was -1.80 SD, equating to a reduction of raw circulating protein levels to approximately half (47.3%), with some notable exceptions (**Supplementary Table 7**). The estimated effects of predicted loss-of-function variants were weaker towards the 3' ends of the gene, consistent with variants in the last exon escaping nonsense mediated decay, (**Extended Data Fig. 2**). Missense variants were associated with a weaker effect, reducing circulating protein levels by 15.7% (-1.05SD) on average (**Extended Data Fig. 2**), and the average effect of synonymous variants was closer to zero (-0.463SD).

We identified 8 rare variants which, despite being annotated as loss-of-function, were associated with increased circulating protein levels (**Supplementary Table 7**). The eighty-two carriers of the splice region variant 8:23028330:C:T were unusually consistently affected, such that they generate a secondary, bimodal peak in raw TNFRSF10B measurement levels. On the raw scale, the splice variant was associated with more than 140x the mean protein levels (beta = 144.1 [143.8, 144.4],  $P < 1 \times 10^{-300}$ ), which was consistent across all carriers. The 1bp deletion was not associated with such dramatic changes on the raw scale (beta = 2.67 [2.15, 3.20],  $P = 3.31 \times 10^{-23}$ ).
